# Supplementary material for: Imidazole-appended 9,10-anthracenedicarboxamide probe for sensing nitrophenols and selective determination of 2,4,6-trinitrophenol in an EtOH–water medium
Source: Royal Society of Chemistry journal article supplement (doi:10.1039/c6ra17407h), 2016-01-01
Supplement: c6ra17407h1.pdf [file c6ra17407h1.pdf]

## ESI

### Imidazole-appended 9,10-anthracenedicarboxamide probe for sensing nitrophenols and selective determination of 2,4,6-trinitrophenol in an EtOH-water medium

Anup Pandith, Ashwani Kumar and Hong Seok Kim\*

*Department of Applied Chemistry, School of Applied Chemical Engineering,*

*Kyungpook National University, Daegu 41566, Republic of Korea*

*Corresponding author: Tel.: +82 53 9505588; fax: +82 53 9506594.*

*E-mail address: [kimhs@knu.ac.kr](mailto:kimhs@knu.ac.kr)*

#### Contents

|                                                                                                                                                                                  |    |
|----------------------------------------------------------------------------------------------------------------------------------------------------------------------------------|----|
| 1. $^1\text{H}$ and $^{13}\text{C}$ NMR spectra of probe <b>AIM-D</b> in $\text{DMSO}-d_6$ .....                                                                                 | 5  |
| 2. HRMS spectra of probe <b>AIM-D</b> .....                                                                                                                                      | 6  |
| 3. Fluorescence emission behavior of probe <b>AIM-D</b> and <b>AIM-M</b> , (0.2 $\mu\text{M}$ ) in EtOH.....                                                                     | 6  |
| 4. Effect of solvents on the fluorescence emission behavior of probe <b>AIM-D</b> and <b>AIM-M</b> , (0.2 $\mu\text{M}$ ) in EtOH.....                                           | 7  |
| 5. Fluorescence quenching efficiency of probe <b>AIM-D</b> (0.2 $\mu\text{M}$ ) with <b>TNP</b> (0.2 $\mu\text{M}$ ) in EtOH.....                                                | 7  |
| 6. Effect of water on the fluorescence emission behavior of probe <b>AIM-D</b> (0.2 $\mu\text{M}$ ) in EtOH.....                                                                 | 8  |
| 7. UV-vis spectra of probe <b>AIM-D</b> (0.2 $\mu\text{M}$ ) with 5.0 eq. of phenol derivatives in EtOH- $\text{H}_2\text{O}$ (1:1) system.....                                  | 9  |
| 8. Stern-Volmer plot of probe <b>AIM-D</b> with various concentration of TNP (0-400 nM) at $\lambda_{\text{ex}} = 366 \text{ nm}$ , $\lambda_{\text{em}} = 393 \text{ nm}$ ..... | 9  |
| 9. Lowest detection limit for TNP .....                                                                                                                                          | 9  |
| 10. Job's plot of probe <b>AIM-D</b> with TNP .....                                                                                                                              | 10 |

11. Fluorescence titration spectra of probe **AIM-D** (0.2  $\mu\text{M}$ ) with 2,4-DNP (1  $\mu\text{M}$ ) in EtOH:H<sub>2</sub>O (1:1) system,  $\lambda_{\text{ex}} = 366 \text{ nm}$ ; b) Stern-Volmer plot of probe **AIM-D** (0.2  $\mu\text{M}$ ) with 20 to 400 nM concentration of 2,4-DNP,  $\lambda_{\text{ex}} = 366 \text{ nm}$ ,  $\lambda_{\text{em}} = 417 \text{ nm}$ .....11
12. Fluorescence titration spectra of probe **AIM-D** (0.2  $\mu\text{M}$ ) with 3,4-DNP (1  $\mu\text{M}$ ) in EtOH:H<sub>2</sub>O (1:1) system,  $\lambda_{\text{ex}} = 366 \text{ nm}$ ; b) Stern-Volmer plot of probe **AIM-D** (0.2  $\mu\text{M}$ ) with 20 to 400 nM concentration of 3,4-DNP,  $\lambda_{\text{ex}} = 366 \text{ nm}$ ,  $\lambda_{\text{em}} = 417 \text{ nm}$ .....11
13. Fluorescence titration spectra of probe **AIM-D** (0.2  $\mu\text{M}$ ) with 2-NP (1  $\mu\text{M}$ ) in EtOH:H<sub>2</sub>O (1:1) system,  $\lambda_{\text{ex}} = 366 \text{ nm}$ ; b) Stern-Volmer plot of probe **AIM-D** (0.2  $\mu\text{M}$ ) with 20 to 400 nM concentration of 2-NP,  $\lambda_{\text{ex}} = 366 \text{ nm}$ ,  $\lambda_{\text{em}} = 417 \text{ nm}$ ..... 12
14. Fluorescence titration spectra of probe **AIM-D** (0.2  $\mu\text{M}$ ) with 4-NP (1  $\mu\text{M}$ ) in EtOH:H<sub>2</sub>O (1:1) system,  $\lambda_{\text{ex}} = 366 \text{ nm}$ ; b) Stern-Volmer plot of probe **AIM-D** (0.2  $\mu\text{M}$ ) with 20 to 400 nM concentration of 4-NP,  $\lambda_{\text{ex}} = 366 \text{ nm}$ ,  $\lambda_{\text{em}} = 417 \text{ nm}$ .....12
15. Job's plot of probe **AIM-D** (0.2  $\mu\text{M}$ ) with a) 2,4-DNP (0.2  $\mu\text{M}$ ), b) 3,4-DNP in EtOH:H<sub>2</sub>O (1:1) system,  $\lambda_{\text{ex}} = 366 \text{ nm}$ ,  $\lambda_{\text{em}} = 417 \text{ nm}$ ..... 13
16. Job's plot of probe **AIM-D** (0.2  $\mu\text{M}$ ) with a) 2-NP (0.2  $\mu\text{M}$ ), b) 4-NP in EtOH:H<sub>2</sub>O (1:1) system,  $\lambda_{\text{ex}} = 366 \text{ nm}$ ,  $\lambda_{\text{em}} = 417 \text{ nm}$ .....13
17. a) Fluorogenic response of probe **AIM-D** (0.2  $\mu\text{M}$ ) with various concentration of 2,4-DNP (0-400 nm), b) shows fluorescence titration studies between probe **AIM-D** vs concentration of 2,4-DNP (0-40 nM) in EtOH:H<sub>2</sub>O (1:1) system,  $\lambda_{\text{ex}} = 366 \text{ nm}$ ,  $\lambda_{\text{em}} = 417 \text{ nm}$ ..... 13
18. a) Fluorogenic response of probe **AIM-D** (0.2  $\mu\text{M}$ ) with various concentration of 3,4-DNP (0-400 nm), b) shows fluorescence titration studies between probe **AIM-D** vs concentration of 3,4-DNP (0-80 nM) in EtOH:H<sub>2</sub>O (1:1) system,  $\lambda_{\text{ex}} = 366 \text{ nm}$ ,  $\lambda_{\text{em}} = 417 \text{ nm}$ .....14
19. a) Fluorogenic response of probe **AIM-D** (0.2  $\mu\text{M}$ ) with various concentration of a) 2-NP and b) 4-NP (0-400 nM) in EtOH:H<sub>2</sub>O (1:1) system,  $\lambda_{\text{ex}} = 366 \text{ nm}$ ,  $\lambda_{\text{em}} = 417 \text{ nm}$ ..... 14
20. Fluorescence titration spectra of probe **AIM-D** (0.2  $\mu\text{M}$ ) with TNP (1  $\mu\text{M}$ ) in DMSO:H<sub>2</sub>O (1:1) system,  $\lambda_{\text{ex}} = 366 \text{ nm}$ .....15

|                                                                                                                                                                                                                                                                                                                                                                                      |    |
|--------------------------------------------------------------------------------------------------------------------------------------------------------------------------------------------------------------------------------------------------------------------------------------------------------------------------------------------------------------------------------------|----|
| 21. Partial $^1\text{H}$ -NMR studies of probe (i) <b>AIM-D</b> ( $5.0 \times 10^{-3}$ M) (ii) 2,4-DNP (2.0 eq) and (iii) 2,4-DNP in DMSO- $d_6$ - $\text{D}_2\text{O}$ (2:1).....                                                                                                                                                                                                   | 15 |
| 22. pH dependent fluorescence studies of the probe <b>AIM-D</b> (0.2 $\mu\text{M}$ ) in EtOH- $\text{H}_2\text{O}$ (1:1) system, $\lambda_{\text{ex}} = 366$ nm, $\lambda_{\text{em}} = 417$ nm.....                                                                                                                                                                                 | 16 |
| 23. Fluorescence titration spectra of <b>AIM-D</b> (0.2 $\mu\text{M}$ ) with TNP (1 $\mu\text{M}$ ) in EtOH- $\text{H}_2\text{O}$ (1:1) at pH 1.5 at $\lambda_{\text{ex}} = 366$ nm.....                                                                                                                                                                                             | 16 |
| 24. Fluorescence titration spectra of <b>AIM-D</b> (0.2 $\mu\text{M}$ ) with TNP (1 $\mu\text{M}$ ) in EtOH- $\text{H}_2\text{O}$ (1:1) at pH 3.5 at $\lambda_{\text{ex}} = 366$ nm.....                                                                                                                                                                                             | 17 |
| 25. Fluorescence titration spectra of <b>AIM-D</b> (0.2 $\mu\text{M}$ ) with TNP (1 $\mu\text{M}$ ) in EtOH- $\text{H}_2\text{O}$ (1:1) at pH 9.5 at $\lambda_{\text{ex}} = 366$ nm.....                                                                                                                                                                                             | 17 |
| 26. Stern-Volmer plot of the probe <b>AIM-D</b> (0.2 $\mu\text{M}$ ) with TNP (0.4 $\mu\text{M}$ ) in EtOH- $\text{H}_2\text{O}$ (1:1), in pH 1.5, 3.5 9.5 and in the presence of 10 mM of $\text{NaNO}_3$ $\lambda_{\text{ex}} = 366$ nm, $\lambda_{\text{em}} = 417$ nm.....                                                                                                       | 18 |
| 27. Fluorescence studies of the probe <b>AIM-D</b> (0.2 $\mu\text{M}$ ) with various metal ions (2.0 $\mu\text{M}$ ) in EtOH- $\text{H}_2\text{O}$ (1:1) system, $\lambda_{\text{ex}} = 366$ nm, $\lambda_{\text{em}} = 417$ nm.....                                                                                                                                                 | 18 |
| 28. Photographs of <b>AIM-D</b> coated Whatman filter paper strips spotted with very small amount of different concentration of nitrophenols, blank has taken with a drop of water, upon illumination at 365 nm in UV lamp.....                                                                                                                                                      | 19 |
| 29. Stern-Volmer plot of the probe <b>AIM-D</b> (0.2 $\mu\text{M}$ ) with 2,4-DNP (3.0 $\mu\text{M}$ ) in EtOH- $\text{H}_2\text{O}$ (1:1), $\lambda_{\text{ex}} = 366$ nm, $\lambda_{\text{em}} = 417$ nm; b) shows enlarged portion from 0 - 400 nM. Water ratio's was chosen from respective water samples such as distilled water (black), river (red) and sea water (blue)..... | 19 |
| 30. Stern-Volmer plot of the probe <b>AIM-D</b> (0.2 $\mu\text{M}$ ) with 3,4-DNP (4.0 $\mu\text{M}$ ) in EtOH- $\text{H}_2\text{O}$ (1:1), $\lambda_{\text{ex}} = 366$ nm, $\lambda_{\text{em}} = 417$ nm; b) shows enlarged portion from 0 - 400 nM. Water ratio's was chosen from respective water samples such as distilled water (black), river (red) and sea water (blue)..... | 20 |
| 31. Stern-Volmer plot of the probe <b>AIM-D</b> (0.2 $\mu\text{M}$ ) with 4-NP (4.0 $\mu\text{M}$ ) in EtOH- $\text{H}_2\text{O}$ (1:1), $\lambda_{\text{ex}} = 366$ nm, $\lambda_{\text{em}} = 417$ nm; b) shows enlarged portion from 0 - 400 nM. Water ratio's was chosen from respective water samples such as distilled water (black), river (red) and sea water (blue).....    | 20 |
| 32. Stern-Volmer plot of the probe <b>AIM-D</b> (0.2 $\mu\text{M}$ ) with 2-NP (4.0 $\mu\text{M}$ ) in EtOH- $\text{H}_2\text{O}$ (1:1), $\lambda_{\text{ex}} = 366$ nm, $\lambda_{\text{em}} = 417$ nm; b) shows enlarged portion from 0 - 400 nM. Water ratio's was chosen from respective water samples such as distilled water (black), river (red) and sea water (blue).....    | 21 |
| 33. UV-Vis spectra of nitrophenols (2 $\mu\text{M}$ ) <b>AIM-D</b> in absolute EtOH and aq.EtOH (EtOH: $\text{H}_2\text{O}$ , 1:1).....                                                                                                                                                                                                                                              | 21 |
| 34. DFT based energy minimized structures of probe <b>AIM-D</b> and its complexes with nitrophenols in EtOH medium using B3LYP/6-31G* set and SM8 solvent model.....                                                                                                                                                                                                                 | 22 |

|                                                                                                                                                                                                                                        |       |
|----------------------------------------------------------------------------------------------------------------------------------------------------------------------------------------------------------------------------------------|-------|
| 35. DFT based band gap energies, interaction energies of nitrophenols in vacuum and in solvents such as EtOH and H <sub>2</sub> O using B3LYP/6-31G* set and SM8 solvent model was used to calculate in respective solvent medium..... | 22-23 |
| 36. Fluorescence decay time measurement (fitted) of probe <b>AIM-D</b> and <b>AIM-D•TNP</b> (1:2 mole ratio) complex in EtOH-H <sub>2</sub> O (1:1) medium.....                                                                        | 23    |
| 37. Table S1. DFT based calculations of band gap energies (eV), interaction energies (kcal/mol) in vacuum, EtOH, DMSO and H <sub>2</sub> O solvents using B3LYP/6-31G* basis set and SM8 solvent model.....                            | 24    |

## Materials and Methods

Nitro-containing explosives, including 2,4,6-trinitrophenol (TNP), 2,4-dinitrophenol (2,4-DNP), 3,4-dinitrophenol (3,4-DNP), 2-nitrophenol (2-NP), and 4-nitrophenol (4NP), 1,4-dinitrobenzene (1,4-DNB), 1,3-dinitrobenzene (1,3-DNB), 2-nitrobenzoic acid (2-NBA), 3,5-dinitrobenzoic acid (3,5-DNBA) were of analytical grade and were used directly without any purification. (Caution: all nitro-containing compounds used in the present study are highly explosive and should be handled only in small quantities). All other reagents were analytically pure. River and sea waters were collected from the Sincheon river, Daegu and seashore area of Busan, collected water samples were filtered through filter paper then used for UV-Vis and fluorescence experiments. Respective water samples quantitative analysis has done after calibration during analysis.

### Preparation of the buffer solution.

The solid standard buffer was used without purification. Respective solid buffers dissolved in EtOH-H<sub>2</sub>O mixture (1:1 v/v) and the exact pH value was obtained by adjusting the using solution of 0.001 M NaOH. All pH value was measured in digital pH meter instrument.

## pH dependent fluorescence studies

pH was maintained using the following solutions [all 0.01 M in EtOH-H<sub>2</sub>O (1:1)] : trichloroacetate (pH 1); dichloroacetate (pH 2); chloroacetate (pH 3); acetate (pH 4 and 5); MES (pH 6); HEPES (pH 7 and 8); CHES (pH 9); CAPS (pH 10 and 11); TBAH (pH 12); NaOH (pH 13);

Abbreviations: Tetrabutylammoniumhydroxide (TBAH), 4-morpholineethanesulfonic acid sodium salt (MES), 4-(2-hydroxyethyl)piperazine-1-ethanesulfonicacid (HEPES), 2-(cyclohexylamino)ethanesulfonic acid (CHES), 3-cyclohexylamino-1-propanesulfonic acid (CAPS).

The fluorescence readings were obtained with maintaining constant pH using various standard buffer solutions\*. Each fluorescence reading was taken and recorded after getting 3 concordant values.

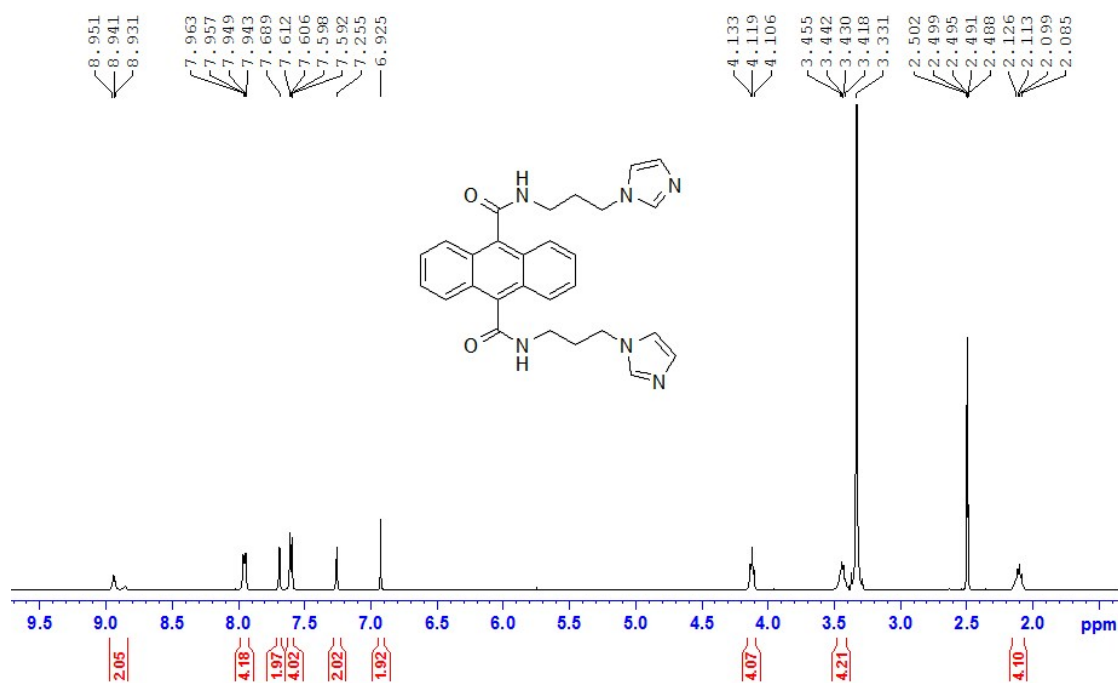

**Fig. 1.** <sup>1</sup>H NMR spectrum of probe **AIM-D** in DMSO-d<sub>6</sub>.

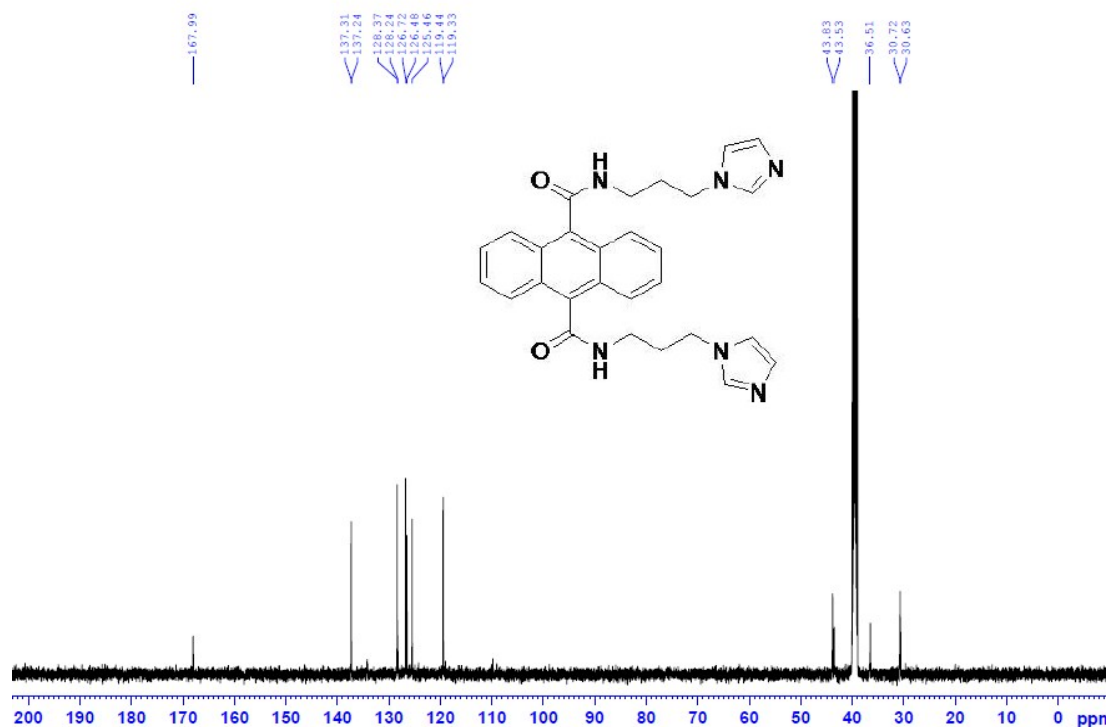

Fig. 2. <sup>13</sup>C NMR spectrum of probe AIM-D in DMSO-*d*<sub>6</sub>.

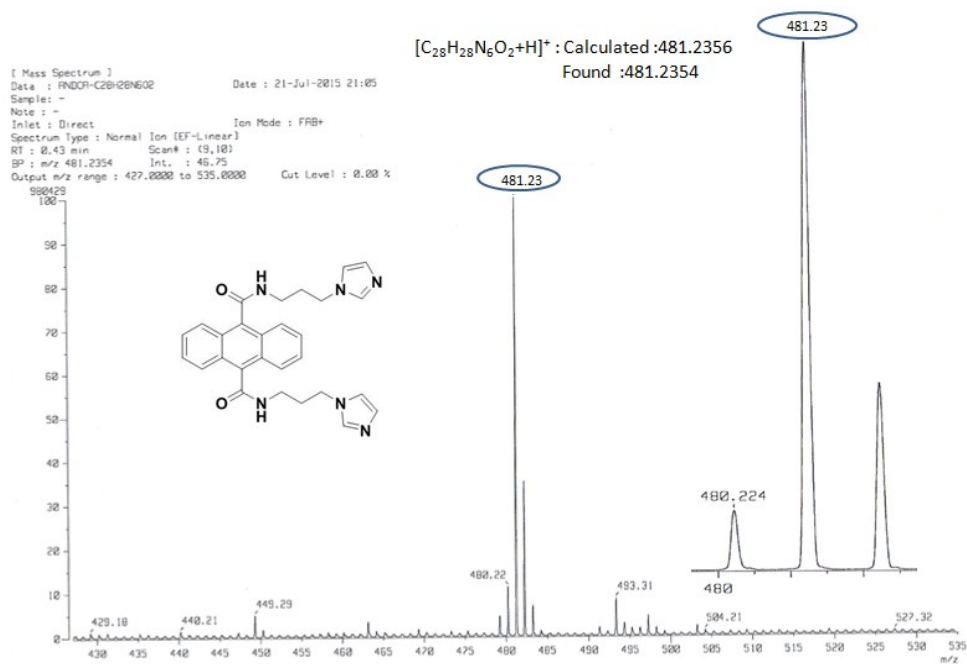

Fig. 3. HRMS spectrum of probe AIM-D.

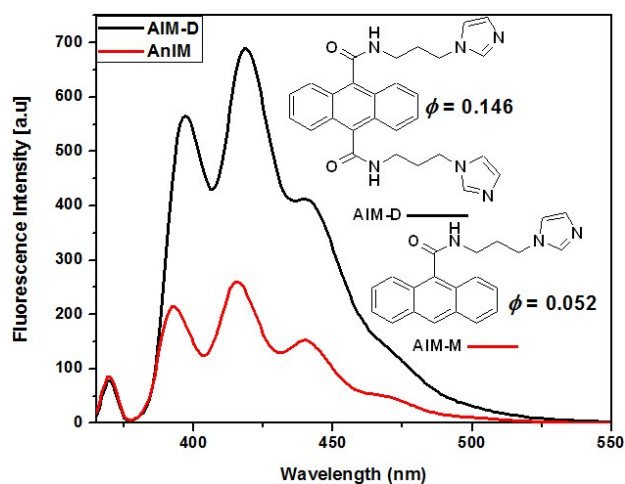

**Fig. S1.** Fluorescence emission behaviour of the probe **AIM-D** and **AIM-M** 0.2  $\mu\text{M}$  in EtOH medium  $\lambda_{\text{ex}} = 366 \text{ nm}$ .

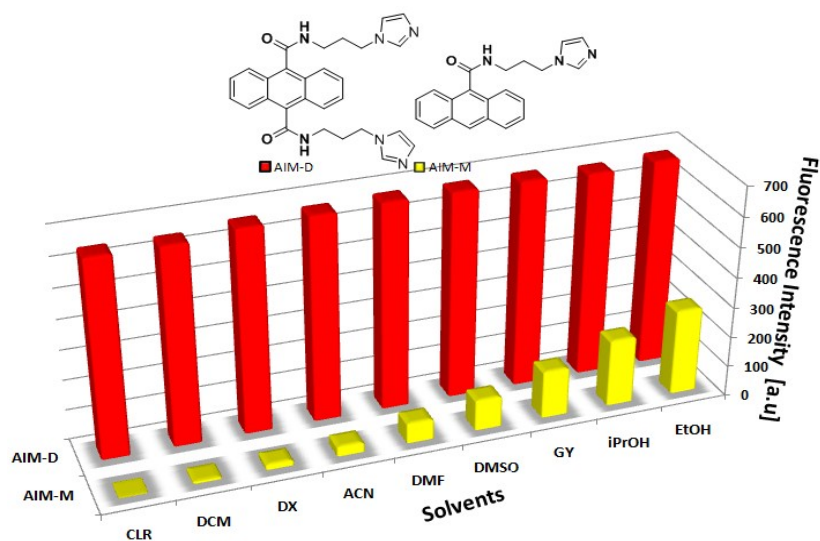

**Fig. S2.** Effect of solvents on the fluorescence emission behaviour of probe **AIM-D** and **AIM-M**, 0.2  $\mu\text{M}$  in EtOH medium,  $\lambda_{\text{ex}} = 366 \text{ nm}$ ,  $\lambda_{\text{em}} = 417 \text{ nm}$ .

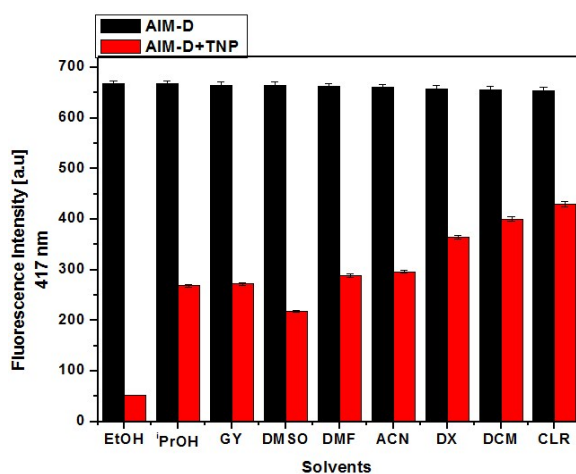

**Fig. S3.** Fluorescence quenching efficiency with probe **AIM-D** (0.2  $\mu\text{M}$ ) in EtOH medium, with TNP (0.2  $\mu\text{M}$ )  $\lambda_{\text{ex}} = 366 \text{ nm}$ ,  $\lambda_{\text{em}} = 417 \text{ nm}$ .

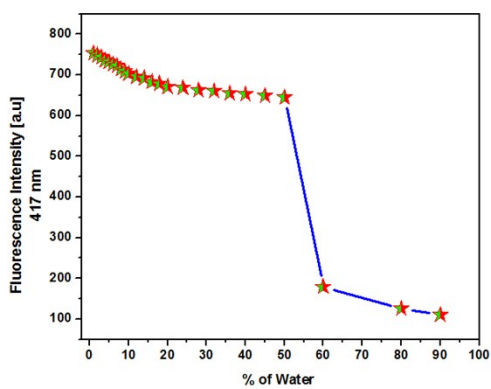

**Fig. S4.** Effect of water on the fluorescence emission behaviour of the probe **AIM-D** (0.2  $\mu\text{M}$ ) in EtOH medium,  $\lambda_{\text{ex}} = 366 \text{ nm}$ ,  $\lambda_{\text{em}} = 417 \text{ nm}$ .

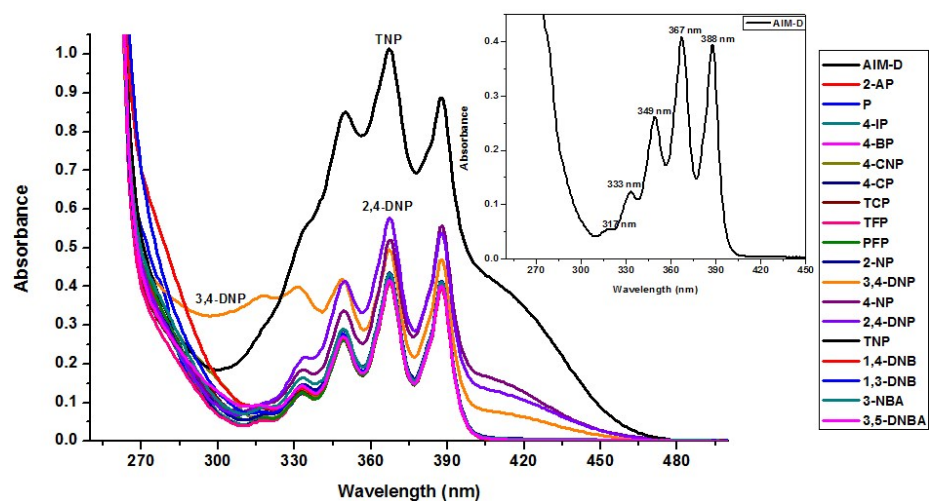

**Fig. S5.** UV-Vis, spectra of the probe **AIM-D** (0.2  $\mu\text{M}$ ) with various 5.0 eq. of phenol derivatives in EtOH-H<sub>2</sub>O (1:1) system.

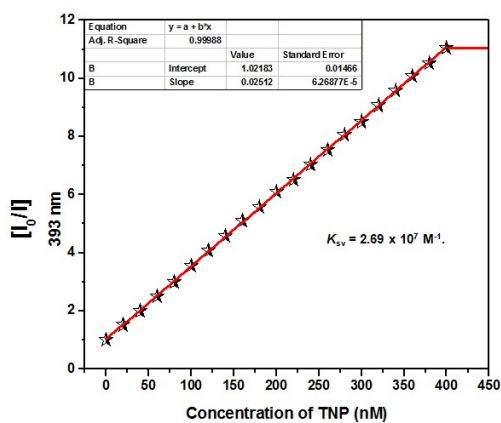

**Fig. S6.** Stern-Volmer plot of probe **AIM-D** with various concentration of TNP (0-400 nM) at  $\lambda_{ex} = 366$  nm,  $\lambda_{em} = 393$  nm.

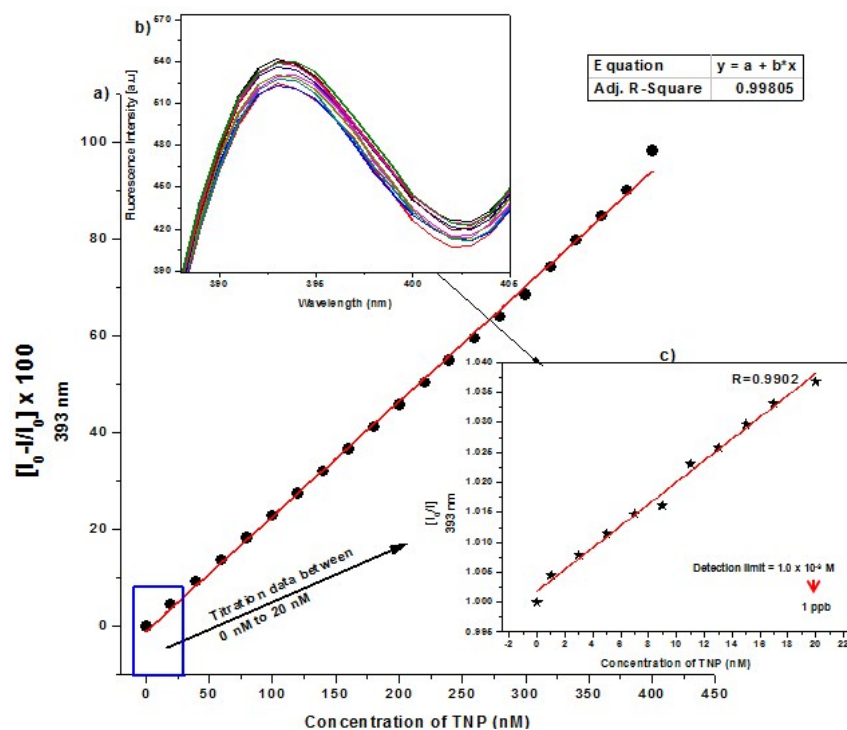

**Fig. S7.** a) Changes in the initial fluorescence intensity of **AIM-D**, upon gradual addition of TNP (0 - 400 nM) in EtOH-H<sub>2</sub>O (1:1). Inset: b) The lowest possible quenching response of probe **AIM-D**, with PA (0 - 20 nM) showing the lowest detection limit of TNP,  $\lambda_{ex} = 366 \text{ nm}$  : c) Plot of intensity quenching ratio vs concentration (0 - 20 nM) at  $\lambda_{ex} = 366 \text{ nm}$ ,  $\lambda_{em} = 393 \text{ nm}$ .

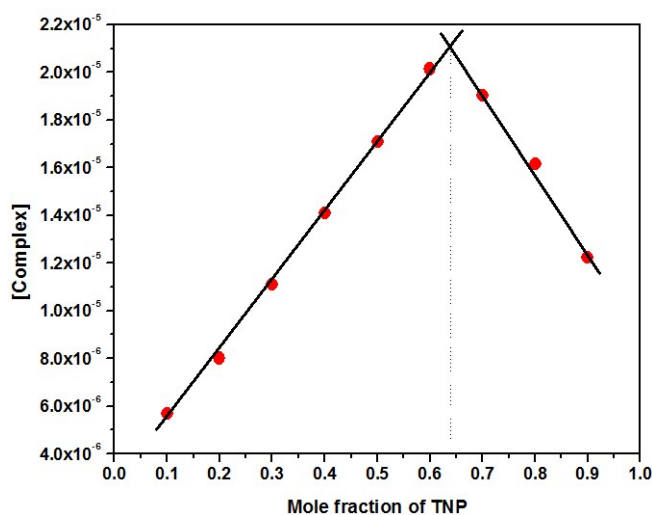

**Fig. S8.** Job's plot of **AIM-D** (0.2  $\mu\text{M}$ ) with TNP (0.2  $\mu\text{M}$ ) in EtOH:H<sub>2</sub>O, 1:1 ratio:  $\lambda_{ex} = 366 \text{ nm}$ ,  $\lambda_{em} = 393 \text{ nm}$ .

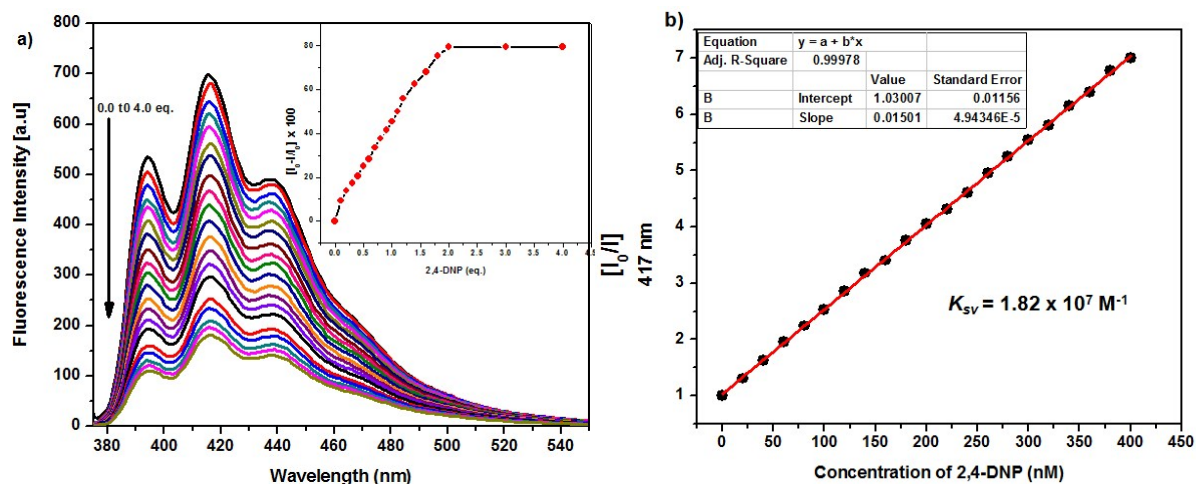

**Fig. S9.** Fluorescence titration spectra of probe **AIM-D** (0.2  $\mu\text{M}$ ) with 2,4-DNP (1  $\mu\text{M}$ ) in EtOH:H<sub>2</sub>O (1:1) system,  $\lambda_{\text{ex}} = 366 \text{ nm}$ ; b) Stern-Volmer plot of probe **AIM-D** (0.2  $\mu\text{M}$ ) with 20 to 400 nM concentration of 2,4-DNP,  $\lambda_{\text{ex}} = 366 \text{ nm}$ ,  $\lambda_{\text{em}} = 417 \text{ nm}$ .

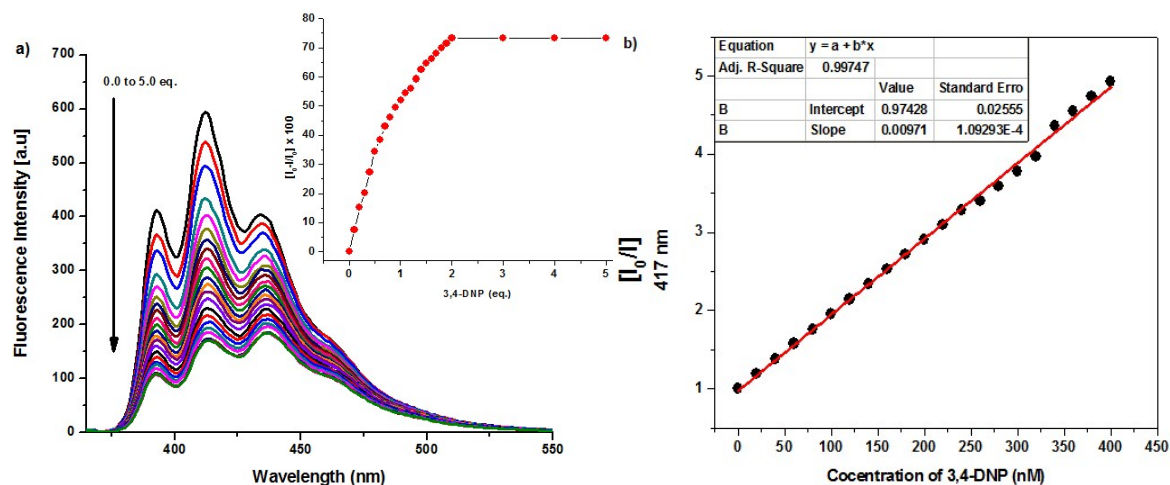

**Fig. S10.** Fluorescence titration spectra of probe **AIM-D** (0.2  $\mu\text{M}$ ) with 3,4-DNP (1  $\mu\text{M}$ ) in EtOH:H<sub>2</sub>O (1:1) system,  $\lambda_{\text{ex}} = 366 \text{ nm}$ ; b) Stern-Volmer plot of probe **AIM-D** (0.2  $\mu\text{M}$ ) with 20 to 400 nM concentration of 3,4-DNP,  $\lambda_{\text{ex}} = 366 \text{ nm}$ ,  $\lambda_{\text{em}} = 417 \text{ nm}$ .

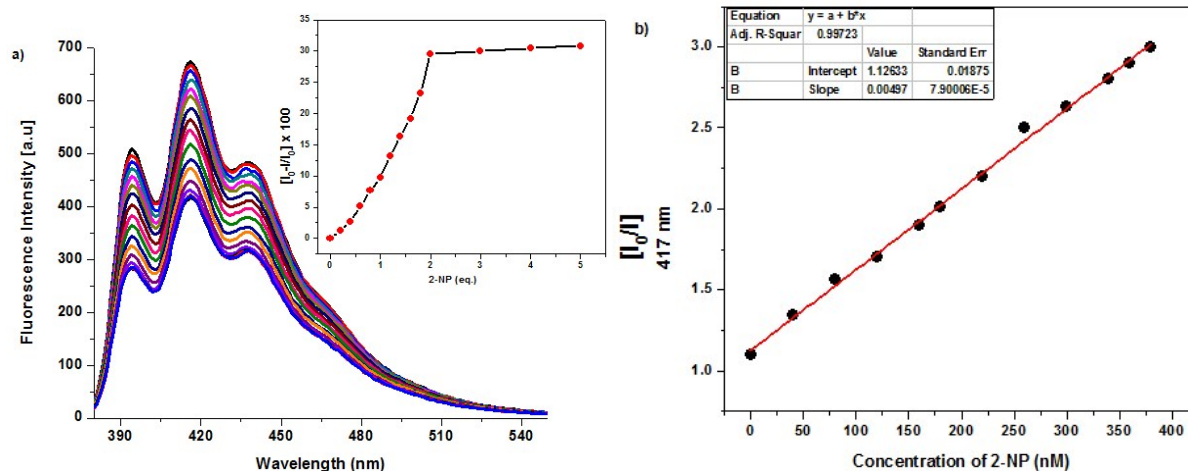

**Fig. S11.** Fluorescence titration spectra of probe **AIM-D** (0.2  $\mu\text{M}$ ) with 2-NP (1  $\mu\text{M}$ ) in EtOH:H<sub>2</sub>O (1:1) system,  $\lambda_{\text{ex}} = 366$  nm; b) Stern-Volmer plot of probe **AIM-D** (0.2  $\mu\text{M}$ ) with 20 to 400 nM concentration of 2-NP,  $\lambda_{\text{ex}} = 366$  nm,  $\lambda_{\text{em}} = 417$  nm.

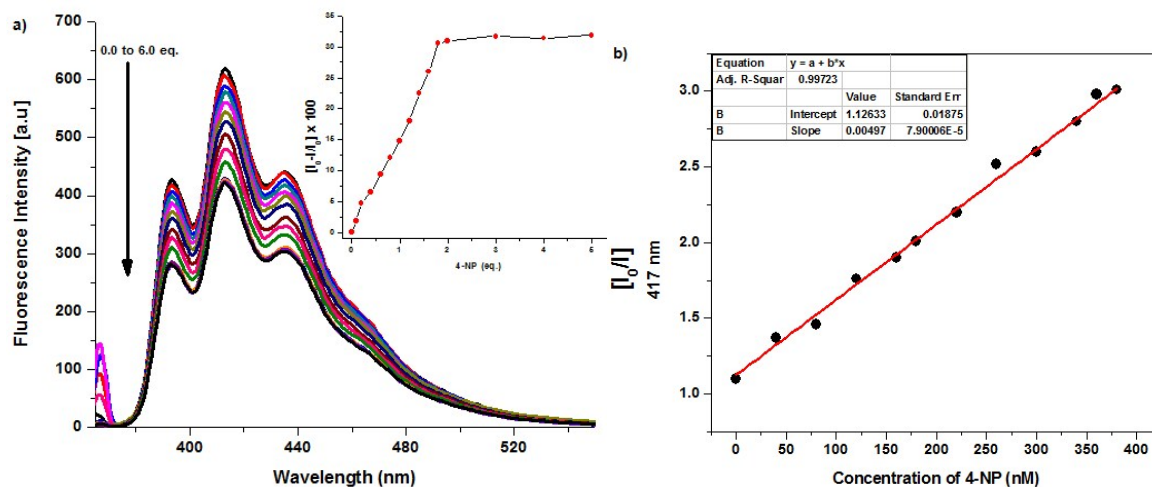

**Fig. S12.** Fluorescence titration spectra of probe **AIM-D** (0.2  $\mu\text{M}$ ) with 4-NP (1  $\mu\text{M}$ ) in EtOH:H<sub>2</sub>O (1:1) system,  $\lambda_{\text{ex}} = 366$  nm; b) Stern-Volmer plot of probe **AIM-D** (0.2  $\mu\text{M}$ ) with 20 to 400 nM concentration of 4-NP,  $\lambda_{\text{ex}} = 366$  nm,  $\lambda_{\text{em}} = 417$  nm.

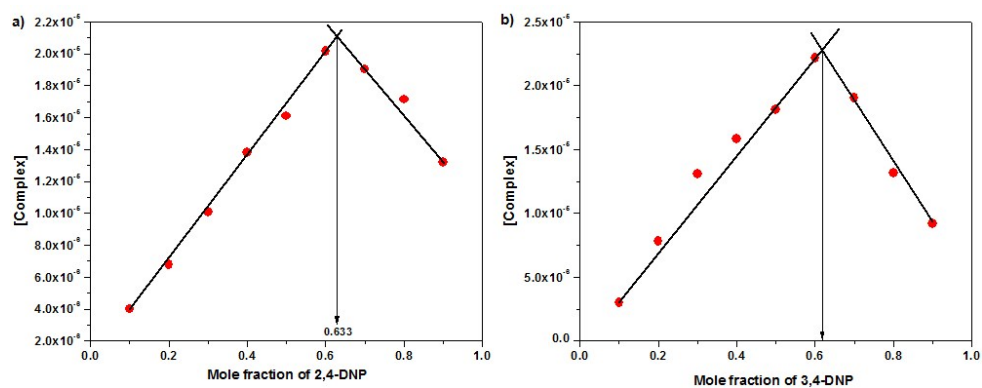

**Fig. S13.** Job's plot of probe **AIM-D** (0.2  $\mu\text{M}$ ) with a) 2,4-DNP (0.2  $\mu\text{M}$ ), b) 3,4-DNP in EtOH:H<sub>2</sub>O (1:1) system,  $\lambda_{\text{ex}} = 366 \text{ nm}$ ,  $\lambda_{\text{em}} = 417 \text{ nm}$ .

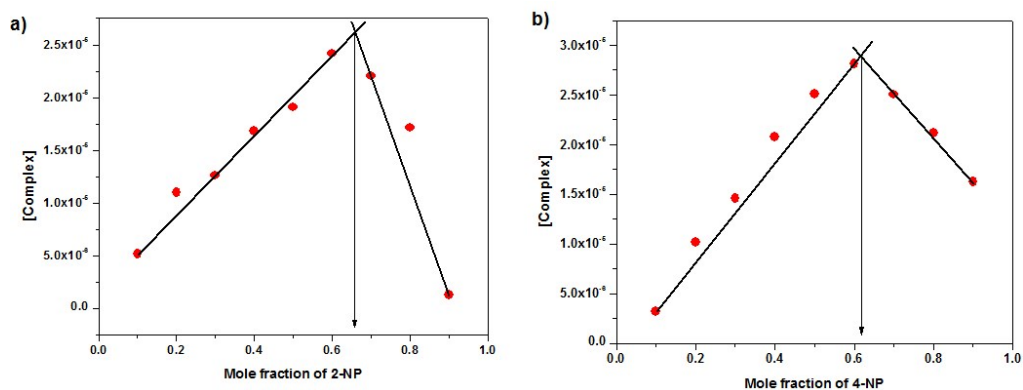

**Fig. S14.** Job's plot of probe **AIM-D** (0.2  $\mu\text{M}$ ) with a) 2-NP (0.2  $\mu\text{M}$ ), b) 4-NP in EtOH:H<sub>2</sub>O (1:1) system,  $\lambda_{\text{ex}} = 366 \text{ nm}$ ,  $\lambda_{\text{em}} = 417 \text{ nm}$ .

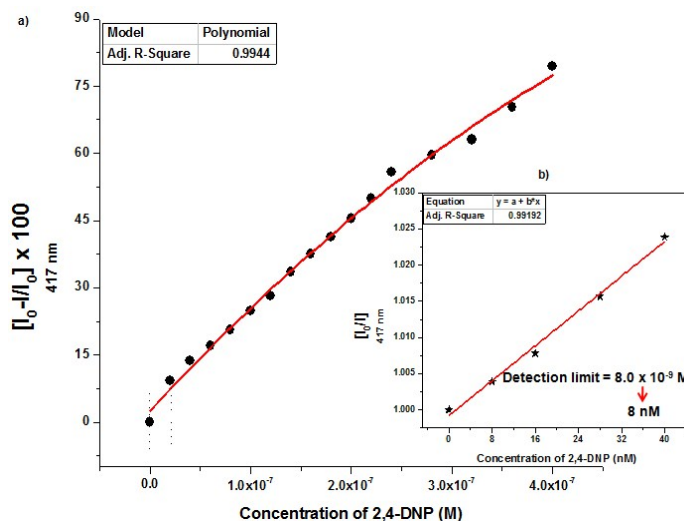

**Fig. S15.** a) Fluorogenic response of probe **AIM-D** (0.2 μM) with various concentration of 2,4-DNP (0-400 nM); b) shows fluorescence titration studies between probe **AIM-D** vs concentration of 2,4-DNP (0-40 nM) in EtOH:H<sub>2</sub>O (1:1) system,  $\lambda_{\text{ex}} = 366 \text{ nm}$ ,  $\lambda_{\text{em}} = 417 \text{ nm}$ .

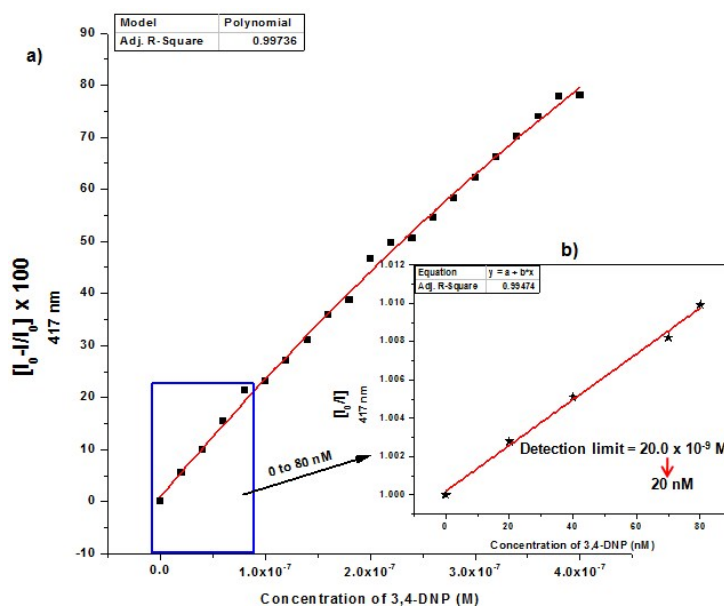

**Fig. S16.** a) Fluorogenic response of probe **AIM-D** (0.2 μM) with various concentration of 3,4-DNP (0-400 nM); b) shows fluorescence titration studies between probe **AIM-D** vs concentration of 3,4-DNP (0-80 nM) in EtOH:H<sub>2</sub>O (1:1) system,  $\lambda_{\text{ex}} = 366 \text{ nm}$ ,  $\lambda_{\text{em}} = 417 \text{ nm}$ .

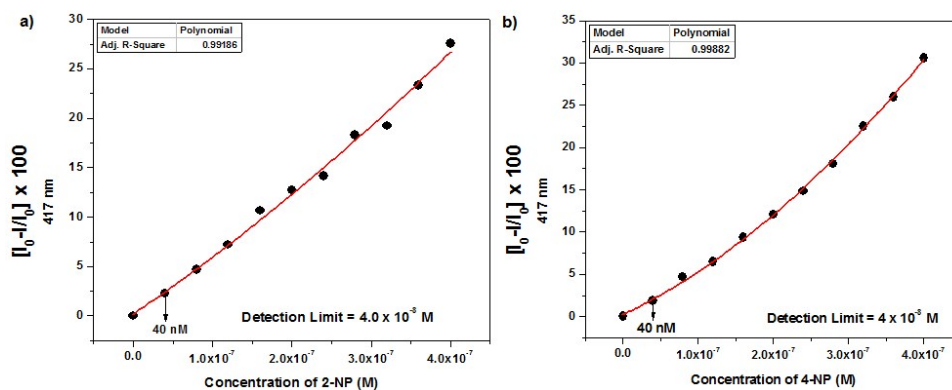

**Fig. S17.** Fluorogenic response of probe **AIM-D** (0.2  $\mu\text{M}$ ) with various concentration of a) 2-NP and b) 4-NP (0-400 nM) in EtOH:H<sub>2</sub>O (1:1) system,  $\lambda_{\text{ex}} = 366$  nm,  $\lambda_{\text{em}} = 417$  nm.

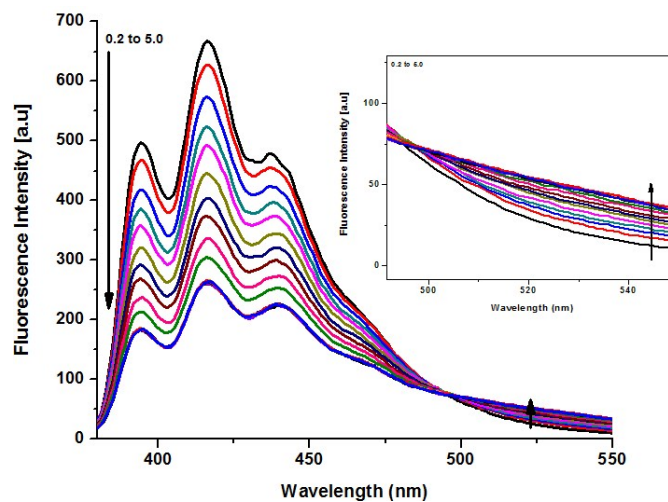

**Fig. S18.** Fluorescence titration spectra of probe **AIM-D** (0.2  $\mu\text{M}$ ) with TNP (1  $\mu\text{M}$ ) in DMSO:H<sub>2</sub>O (1:1) system,  $\lambda_{\text{ex}} = 366$  nm.

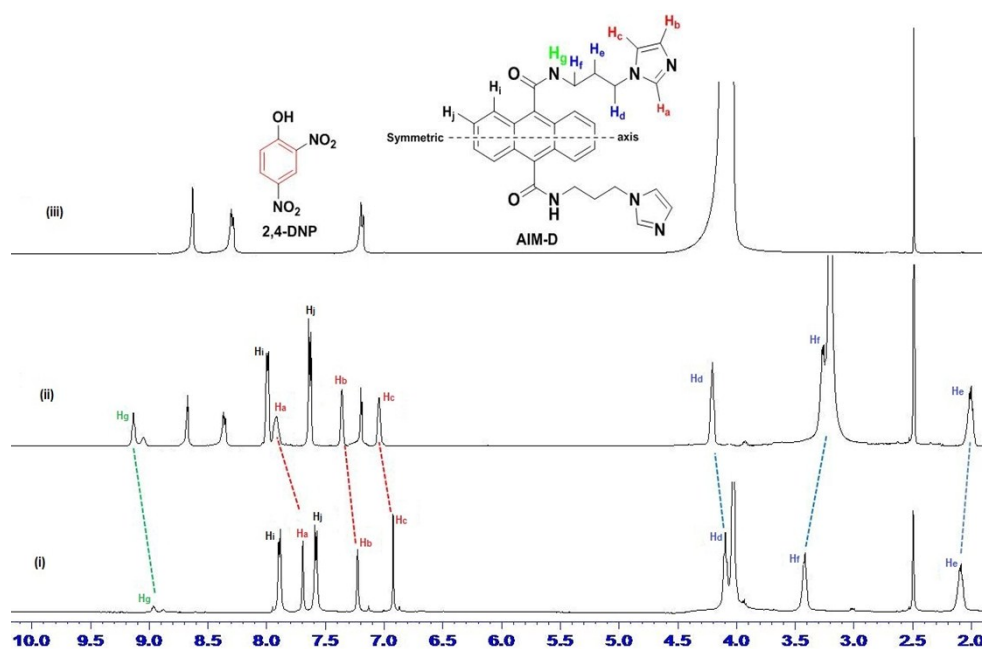

**Fig. S19.** Partial  $^1\text{H}$ -NMR studies of probe (i) **AIM-D** ( $5.0 \times 10^{-3}$  M) (ii) 2,4-DNP (2.0 eq) and (iii) 2,4-DNP in  $\text{DMSO-}d_6\text{-D}_2\text{O}$  (2:1).

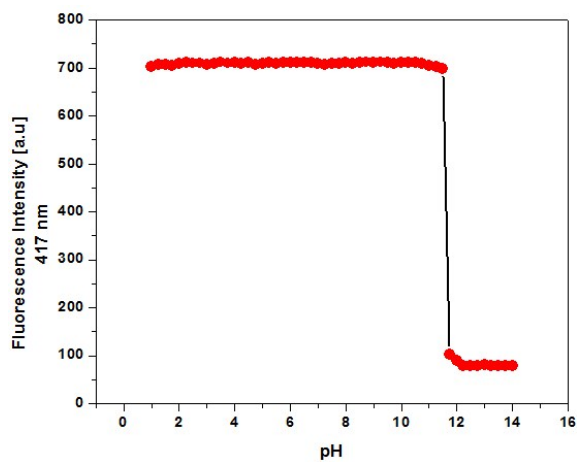

**Fig. S20.** pH dependent fluorescence studies of the probe **AIM-D** (0.2  $\mu\text{M}$ ) in  $\text{EtOH-H}_2\text{O}$  (1:1) system,  $\lambda_{\text{ex}} = 366$  nm,  $\lambda_{\text{em}} = 417$  nm.

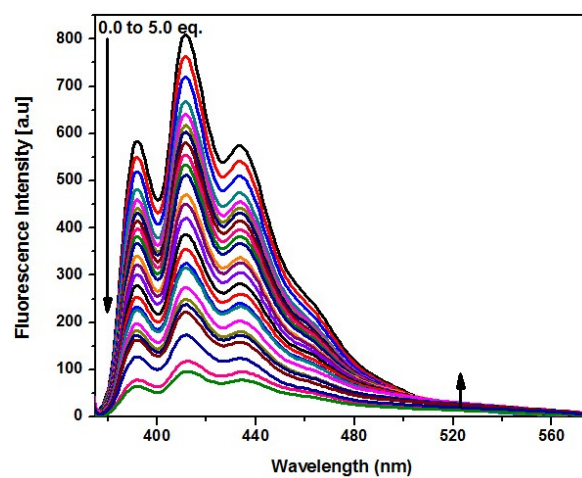

**Fig. S21.** Fluorescence titration spectra of probe **AIM-D** (0.2 μM) with TNP (1 μM) in EtOH:H<sub>2</sub>O (1:1) system, at pH 1.5 (Trichloroacetate buffer)  $\lambda_{ex}$  = 366 nm.

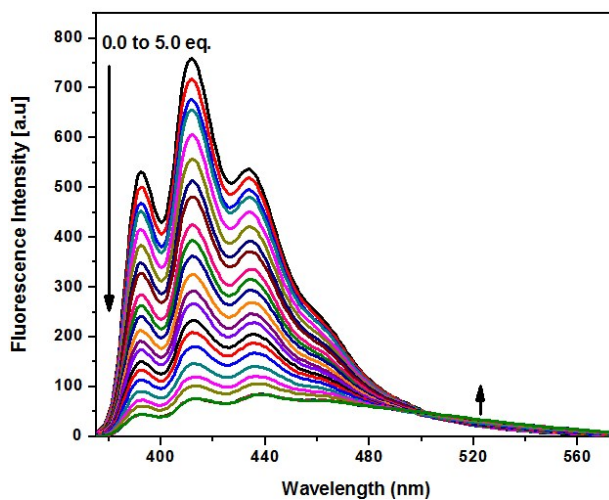

**Fig. S22.** Fluorescence titration spectra of probe **AIM-D** (0.2 μM) with TNP (1 μM) in EtOH:H<sub>2</sub>O (1:1) system, at pH 3.5 (Chloroacetate buffer)  $\lambda_{ex}$  = 366 nm.

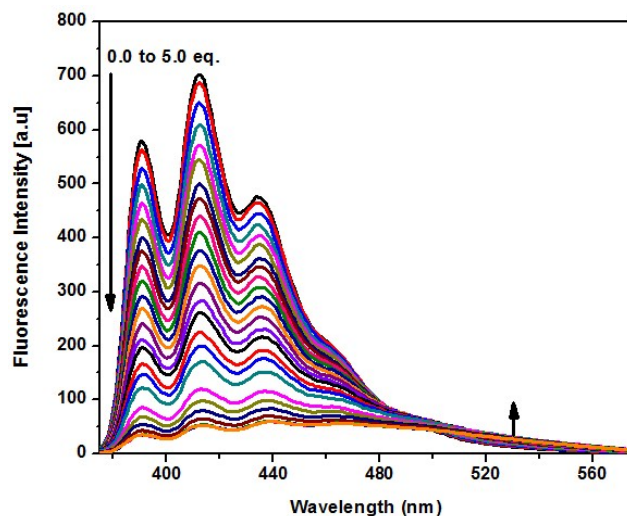

**Fig. S23.** Fluorescence titration spectra of probe **AIM-D** (0.2  $\mu\text{M}$ ) with TNP (1  $\mu\text{M}$ ) in EtOH:H<sub>2</sub>O (1:1) system, at pH 9.5 (CHES buffer)  $\lambda_{\text{ex}} = 366$  nm.

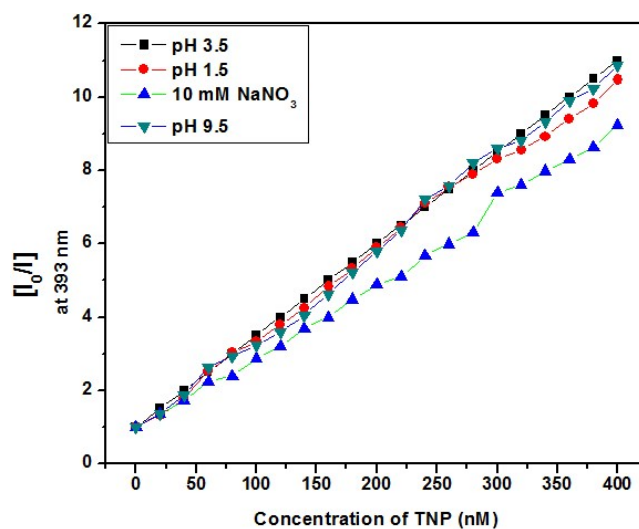

**Fig. S24.** Stern-Volmer plot of the probe **AIM-D** (0.2  $\mu\text{M}$ ) with TNP (0.4  $\mu\text{M}$ ) in at various pH values (1.5-black, 3.5-red and 9.5-green) and in the presence of 10 mM NaNO<sub>3</sub> (blue) in EtOH-H<sub>2</sub>O (1:1),  $\lambda_{\text{ex}} = 366$  nm,  $\lambda_{\text{em}} = 417$  nm.

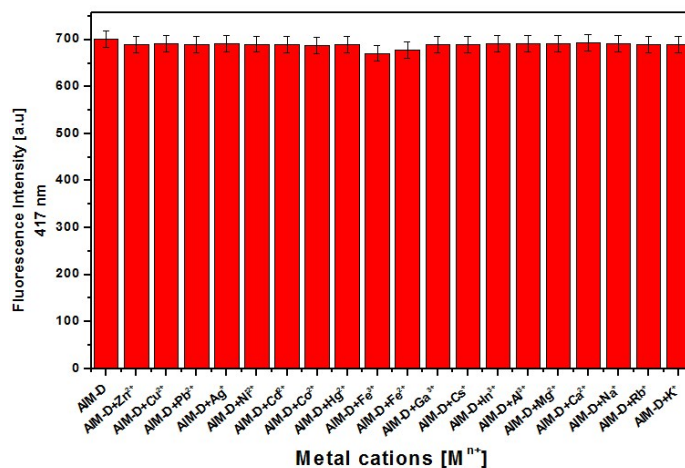

**Fig. S25.** Fluorescence studies of the probe **AIM-D** (0.2  $\mu\text{M}$ ) with various metal ions (2.0  $\mu\text{M}$ ) in EtOH-H<sub>2</sub>O (1:1) system,  $\lambda_{\text{ex}}$  = 366 nm,  $\lambda_{\text{em}}$  = 417 nm.

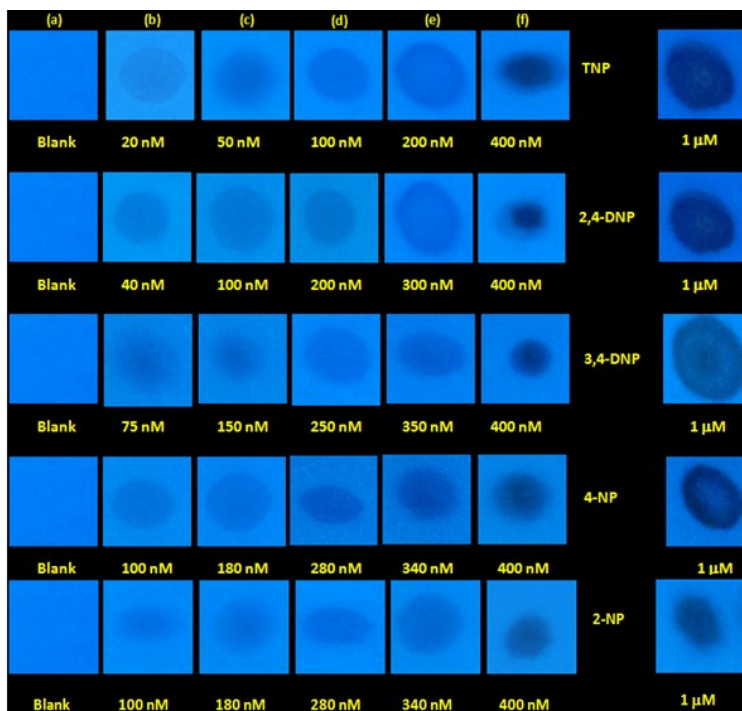

**Fig. S26.** Photographs of **AIM-D** coated Whatman filter paper strips spotted with very small amount of different concentration of nitrophenols, blank has taken with a drop of water, upon illumination at 365 nm in UV lamp.

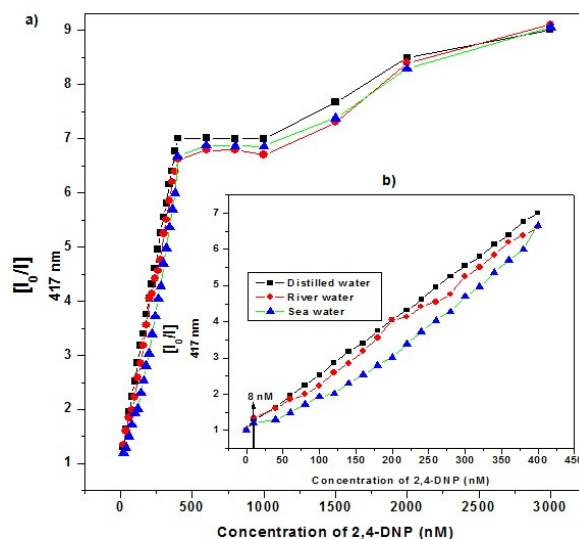

**Fig. S27.** Stern-Volmer plot of the probe **AIM-D** (0.2  $\mu\text{M}$ ) with 2,4-DNP (3.0  $\mu\text{M}$ ) in EtOH-H<sub>2</sub>O (1:1),  $\lambda_{\text{ex}}$  = 366 nm,  $\lambda_{\text{em}}$  = 417 nm; b) shows enlarged portion from 0-400 nM. Water ratio's was chosen from respective water samples such as distilled water (black), river (red) and sea water (blue).

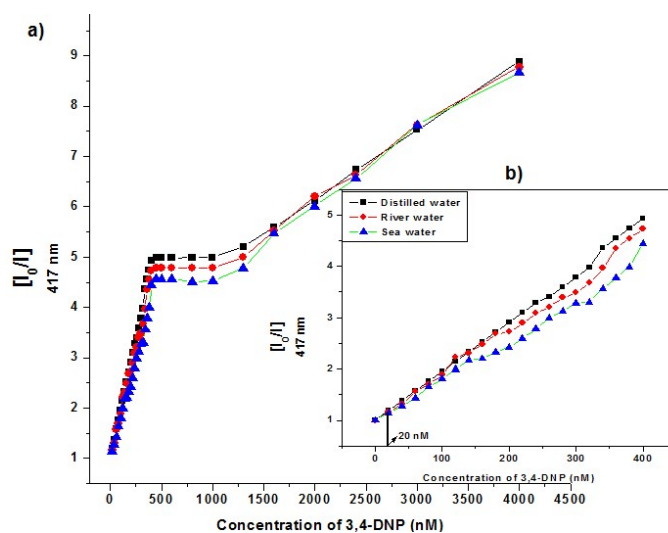

**Fig. S28.** Stern-Volmer plot of the probe **AIM-D** (0.2  $\mu\text{M}$ ) with 3,4-DNP (4.0  $\mu\text{M}$ ) in EtOH-H<sub>2</sub>O (1:1),  $\lambda_{\text{ex}}$  = 366 nm,  $\lambda_{\text{em}}$  = 417 nm; b) shows enlarged portion from 0 - 400 nM. Water ratio's was chosen from respective water samples such as distilled water (black), river (red) and sea water (blue).

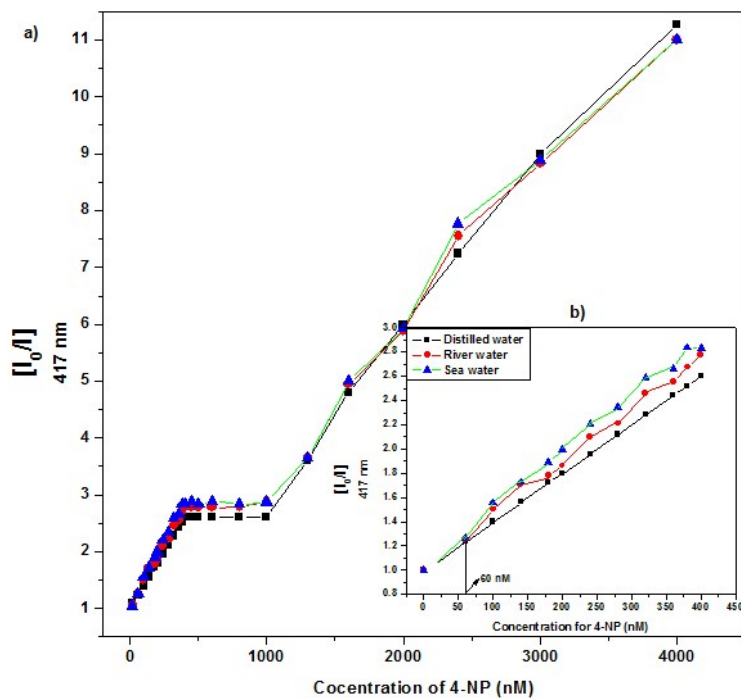

**Fig. S29.** Stern-Volmer plot of the probe **AIM-D** (0.2  $\mu\text{M}$ ) with 4-NP (4.0  $\mu\text{M}$ ) in EtOH-H<sub>2</sub>O (1:1),  $\lambda_{\text{ex}}$  = 366 nm,  $\lambda_{\text{em}}$  = 417 nm; b) shows enlarged portion from 0 - 400 nM. Water ratio's was chosen from respective water samples such as distilled water (black), river (red) and sea water (blue).

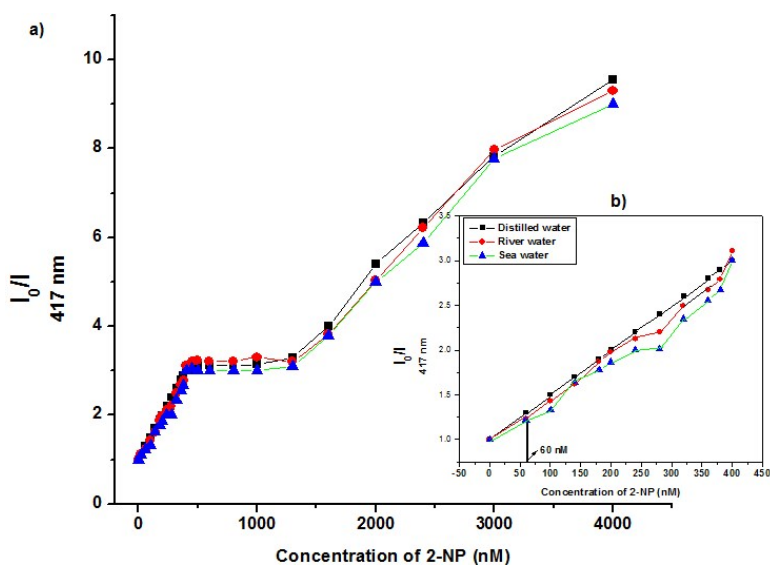

**Fig. S30.** Stern-Volmer plot of the probe **AIM-D** (0.2  $\mu\text{M}$ ) with 2-NP (4.0  $\mu\text{M}$ ) in EtOH-H<sub>2</sub>O (1:1),  $\lambda_{\text{ex}}$  = 366 nm,  $\lambda_{\text{em}}$  = 417 nm; b) shows enlarged portion from 0-400 nM. Water ratio's was chosen from respective water samples such as distilled water (black), river (red) and sea water (blue).

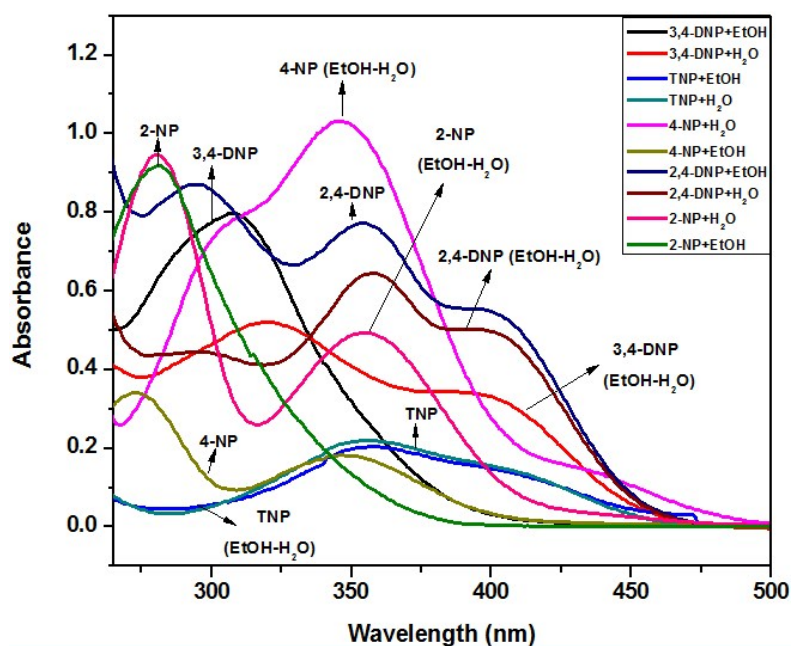

**Fig. S31.** UV-Vis spectra of nitrophenols (2.0  $\mu\text{M}$ ) **AIM-D** in absolute EtOH and aqueous EtOH (EtOH:H<sub>2</sub>O, 1:1).

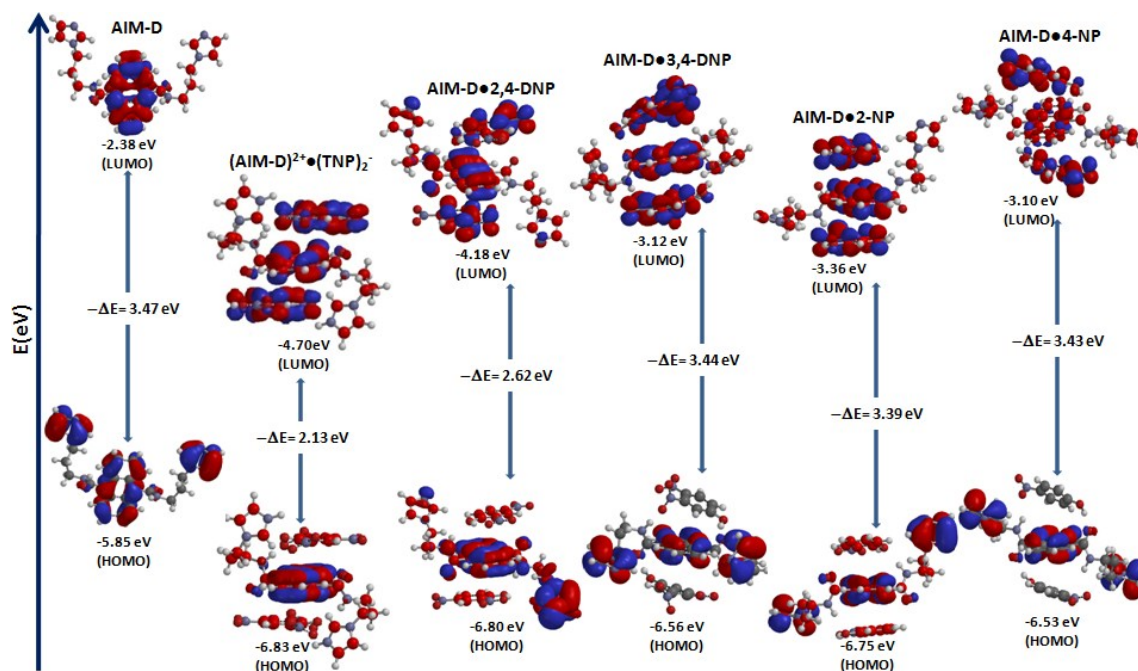

**Fig. S32.** DFT based computational studies of probe **AIM-D** and its complexes with nitrophenols in EtOH medium using B3LYP/6-31G\* set and SM8 solvent model.

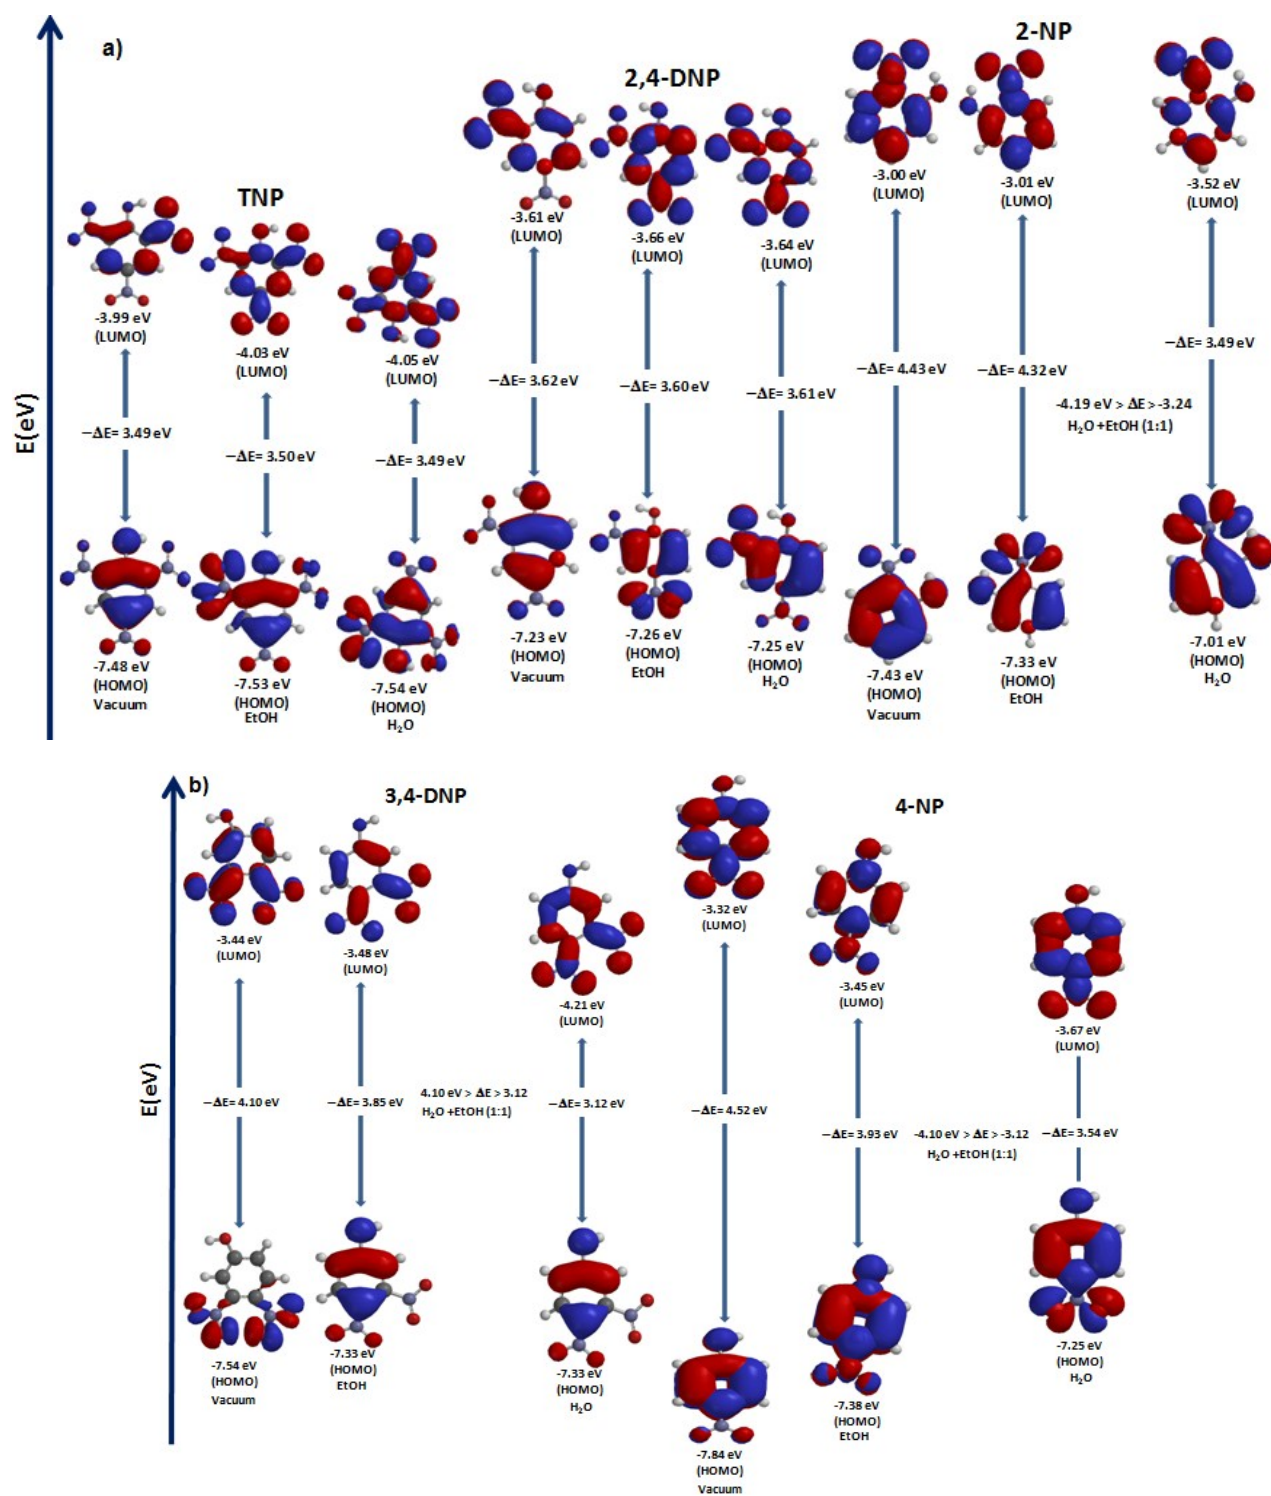

**Fig. S33.** DFT based computational studies of nitrophenols in vacuum and in solvents such as EtOH and H<sub>2</sub>O using B3LYP/6-31G\* set and SM8 solvent model was used to calculate in respective solvent medium.

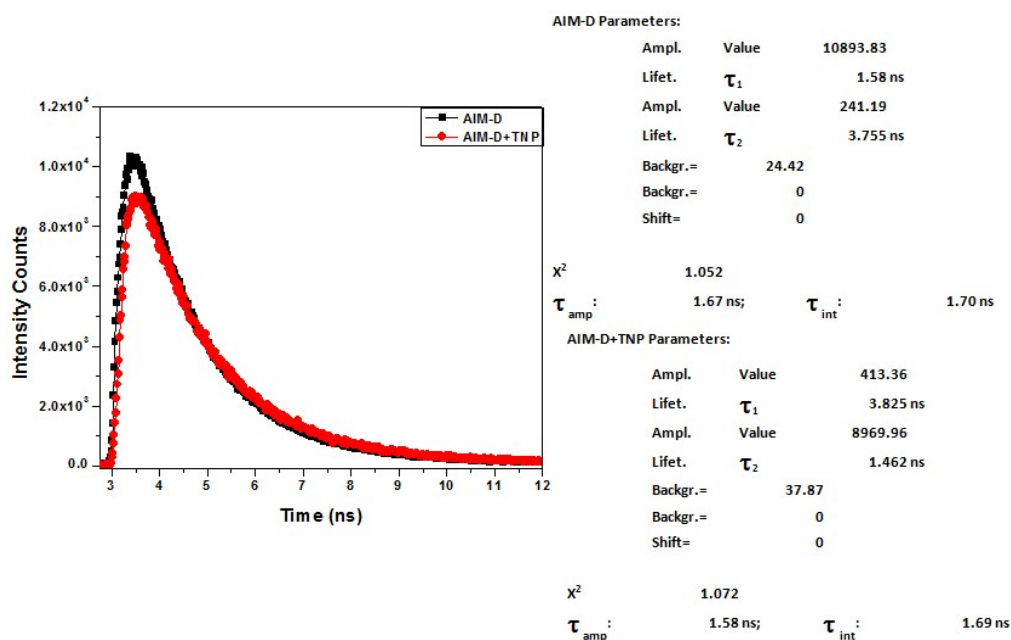

**Fig. S34.** Fluorescence decay time measurement (fitted) of probe **AIM-D** (black) and **AIM-D•TNP** (1:2 mole ratio) complex in EtOH-H<sub>2</sub>O (1:1) medium.

**Table S1.** DFT based calculations of band gap energies (eV), interaction energies (kcal/mol) in vacuum, EtOH, DMSO and H<sub>2</sub>O solvents using B3LYP/6-31G\* basis set and SM8 solvent model.

| AIM-D/AIM-D•Nitrophenol complexes                         | $-\Delta E_{(HOMO-LUMO)} \text{ (eV)}$ |                      |                      |                      | $-\Delta E_{(Interaction \text{ energy})} \text{ (kcal/mol)}$ |                      |                      |                      |
|-----------------------------------------------------------|----------------------------------------|----------------------|----------------------|----------------------|---------------------------------------------------------------|----------------------|----------------------|----------------------|
|                                                           | $-\Delta E_{(vac)}$                    | $-\Delta E_{(DMSO)}$ | $-\Delta E_{(EtOH)}$ | $-\Delta E_{(H_2O)}$ | $-\Delta E_{(vac)}$                                           | $-\Delta E_{(DMSO)}$ | $-\Delta E_{(EtOH)}$ | $-\Delta E_{(H_2O)}$ |
| <b>AIM-D</b>                                              | 3.69                                   | 3.60                 | 3.47                 | 3.68                 | ----                                                          | ----                 | ----                 | ----                 |
| <b>(AIM-D)<sup>2+</sup>•(TNP)<sub>2</sub><sup>-</sup></b> | 2.78                                   | 2.40                 | 2.13                 | 2.69                 | 25.72                                                         | 10.97                | 16.31                | 5.23                 |
| <b>AIM-D•(2,4-DNP)<sub>2</sub></b>                        | 2.70                                   | 2.58                 | 2.62                 | 2.70                 | 16.16                                                         | 5.02                 | 8.27                 | 1.67                 |
| <b>AIM-D•(3,4-DNP)<sub>2</sub></b>                        | 3.62                                   | 3.59                 | 3.44                 | 3.61                 | 10.98                                                         | 3.20                 | 5.32                 | 1.02                 |
| <b>AIM-D•(2-NP)<sub>2</sub></b>                           | 3.59                                   | 3.47                 | 3.39                 | 3.56                 | 7.29                                                          | 3.45                 | 4.65                 | 0.67                 |

---

|                                 |      |      |      |      |      |      |      |      |
|---------------------------------|------|------|------|------|------|------|------|------|
| <b>AIM-D•(4-NP)<sub>2</sub></b> | 3.63 | 3.60 | 3.43 | 3.63 | 3.43 | 1.09 | 2.03 | 0.19 |
|---------------------------------|------|------|------|------|------|------|------|------|

---

\*All calculations has been done according to the most stable stationary points were verified as minima through full calculations of the Hessian and Harmonic frequency analysis.
